# Supplementary material for: Assessment of Anticancer Properties of Argemone mexicana L. and Berberine: A Comparative Study
Source: MDPI journal article supplement (doi:10.3390/plants13101374), 2024-05-15
Supplement: s1 [file s1]

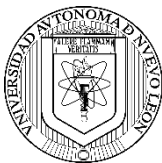

UNIVERSIDAD AUTÓNOMA DE NUEVO LEÓN

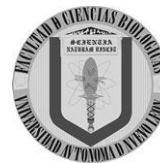

FACULTAD DE CIENCIAS BIOLÓGICAS

**SUBJECT: Research project evaluation**

**Dr. Joel H. Elizondo Luevano**

By this means, you are informed that in a session held on January 22nd, 2023, the research project with registration number CI-01-22-2023 “Antitumor activity of methanolic extracts of Mexican plants and soil and endophytic microorganisms on tumor cell lines” was reviewed and approved.

The global scientific evaluation of this research project complies with technical-scientific quality, scientific relevance and impact, as well as with the criteria, guidelines and institutional requirements.

Sincerely yours,

Yours

*“ALERE FLAMMAM VERITATIS”*

Cd. Universitaria

January 22nd, 2023

Research Committee

Dr. Juan Francisco Contreras

President

Dra. María Julissa Ek Ramos

Secretary
